# Supplementary material for: Loss of myosin light chain kinase induces the cellular senescence associated secretory phenotype to promote breast epithelial cell migration
Source: PubMed Central journal article supplement — Sci Rep. 2024 Oct 28;14:25786. doi: 10.1038/s41598-024-76868-y (PMC11519378; doi:10.1038/s41598-024-76868-y), 2024-10-28
Supplement: 41598_2024_76868_MOESM4_ESM.pdf [file 41598_2024_76868_MOESM4_ESM.pdf]

1 **Supplementary information**

2

3 **Loss of myosin light chain kinase induces the cellular senescence associated**  
4 **secretory phenotype to promote breast epithelial cell migration**

5

6 Dayoung Kim <sup>1,2\*</sup>, Jonathan A. Cooper <sup>1</sup> and David M. Helfman <sup>2</sup>

7

8 1 Basic Sciences Division, Fred Hutchinson Cancer Center, Seattle, WA, 98109, USA

9 2 Department of Biological Sciences, Korea Advanced Institute of Science and Technology,  
10 Daejeon, South Korea

11 \*Correspondence: [dkim23@fredhutch.org](mailto:dkim23@fredhutch.org)

12

13 **Supplementary Figure 1.** Downregulation of MLCK or H<sub>2</sub>O<sub>2</sub> treatment induces cellular  
14 senescence in MCF10A cells.

15 **Supplementary Figure 2.** Downregulation of MLCK decreases cell proliferation and promotes  
16 cell migration in HER2-positive breast cancer cells.

17 **Supplementary Figure 3.** Downregulation of MLCK increases p53-dependent p21 expression.

18 **Supplementary Figure 4.** Source data for Figure 2a and Figure 4c-e

19 **Supplementary Figure 5.** Source data for Supplementary Figure 1a and 2a

20 **Supplementary Figure 6.** Source data for Supplementary Figure 3

21 **Supplementary Video 1.** Scratch wound migration with control siRNA-treated conditioned media.

22 **Supplementary Video 2.** Scratch wound migration with MLCK siRNA-treated conditioned media.

23 **Supplementary Table 1.** Reverse-phase protein array results comparing control and MLCK-  
24 depleted cells.

25

26 **Supplementary Figure 1**

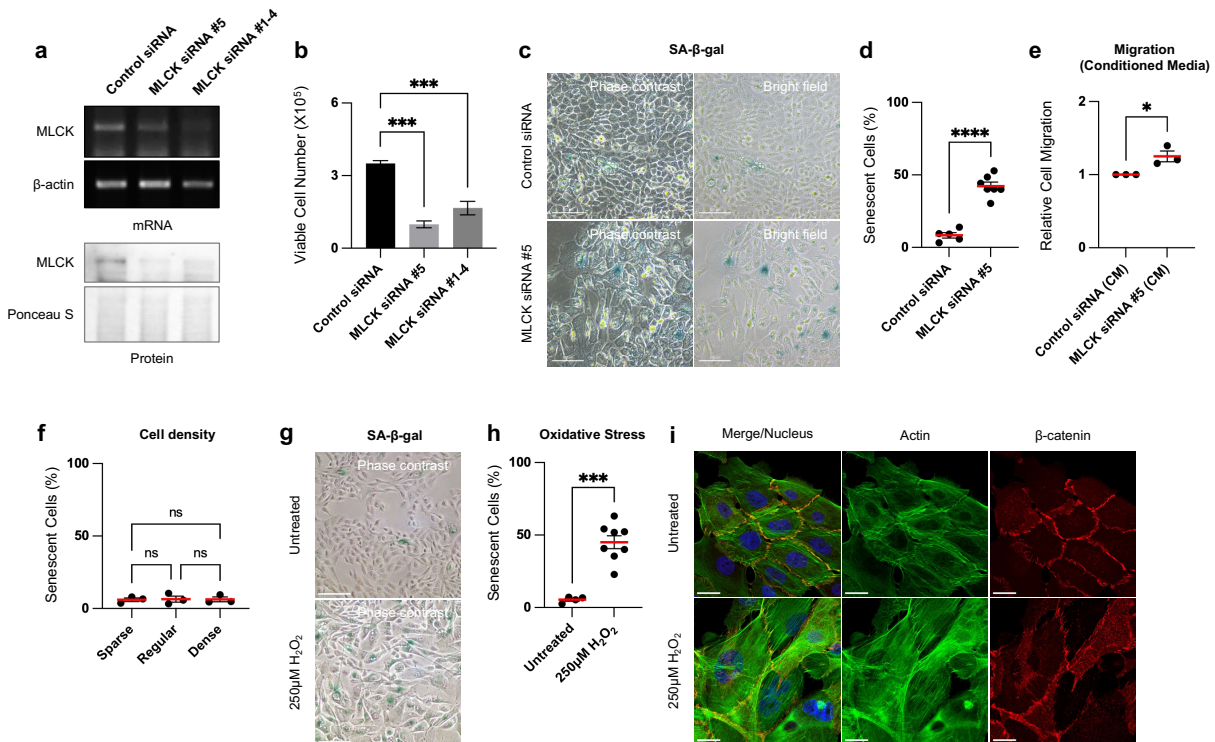

27

28 **Supplementary Figure 1. Downregulation of MLCK or H<sub>2</sub>O<sub>2</sub> treatment induces cellular**

29 **senescence in MCF10A cells.** (a) MLCK mRNA transcript and protein levels 72 hours after

30 treatment with control, single MLCK siRNA (MLCK siRNA #5), or a mixture of four MLCK siRNAs

31 (MLCK siRNA #1-4). β-actin or Ponceau S is shown as a loading control. Original gels/blots are

32 presented in Supplementary Figure 5. (b) MCF10A cells were seeded at identical quantities and

33 counted after 72 hours. Dead cells were excluded using trypan blue staining. n=3 independent

34 experiments. Ordinary one-way ANOVA with Dunnett's multiple comparisons test. (c-d)

35 Representative images and quantification of SA-β-gal staining. Scale bars, 100 μm. n=5-7 fields,

36 2 independent experiments. Paired *t*-test. (e) Scratch wound migration assays were performed

37 under conditioned media from control or MLCK siRNA #5-treated cells. n=3 independent

38 experiments. Paired *t*-test. (f) Quantification of SA-β-gal positive cells in MCF10A cells at different

39 cell densities. n=3 independent experiments. Ordinary one-way ANOVA with Tukey's multiple

40 comparisons test. (g-h) Representative images and quantification of SA-β-gal positive cells after

41 H<sub>2</sub>O<sub>2</sub> treatment in MCF10A cells. Scale bars, 100 μm. n=4-10 fields, 2 independent experiments.

42 Unpaired *t*-test. (i) Representative immunofluorescence max projection images showing actin

43 (green), β-catenin (red) and nucleus (blue). Scale bars, 20 μm. mean±s.e.m. \**P*<0.05, \*\*\**P*<0.001,

44 \*\*\*\**P*<0.0001, ns = not significant.

45 **Supplementary Figure 2**

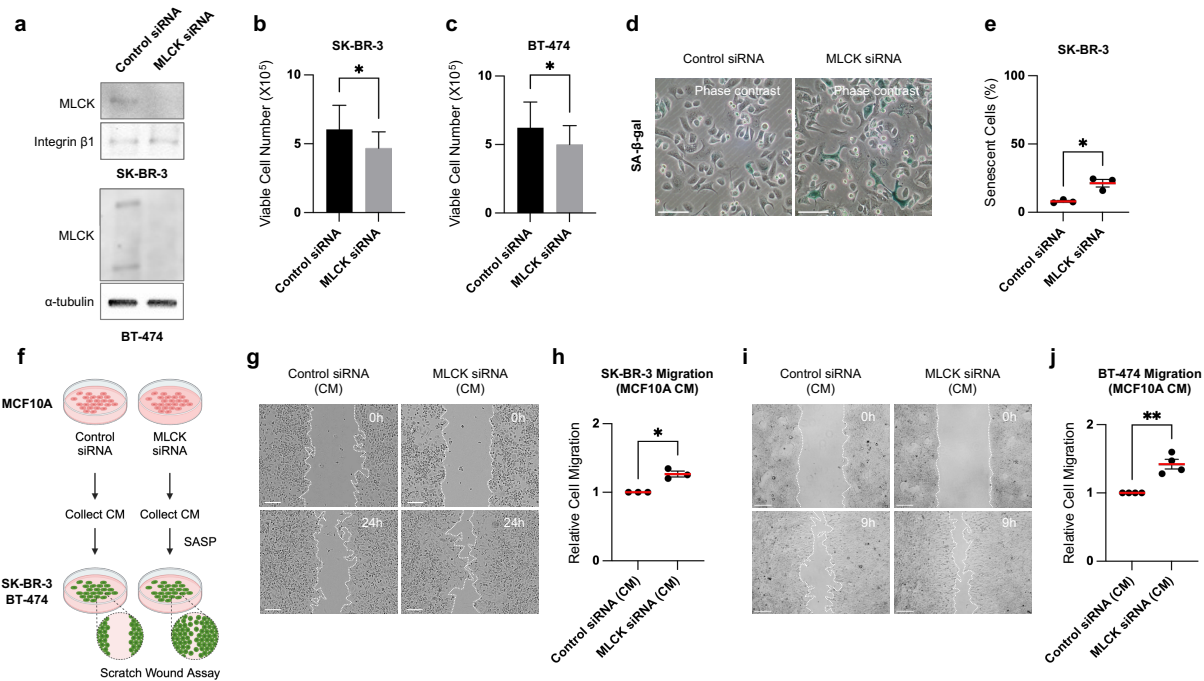

46  
 47 **Supplementary Figure 2. Downregulation of MLCK decreases cell proliferation and**  
 48 **promotes cell migration in HER2-positive breast cancer cells.** (a) Western blot analysis for  
 49 MLCK siRNA expressing SK-BR-3 and BT-474 cells. Integrin  $\beta$ 1 or  $\alpha$ -tubulin is shown as a loading  
 50 control. Original blots are presented in Supplementary Figure 5. (b-c) SK-BR-3 and BT-474 cells  
 51 were seeded at an identical quantity and counted after 72 hr. Dead cells were excluded using  
 52 trypan blue staining.  $n=3$  independent experiments. Ratio Paired  $t$ -test. (d-e) Representative  
 53 images and quantification of SA- $\beta$ -gal staining in SK-BR-3 cells. Scale bars, 100  $\mu$ m.  $n=3$   
 54 independent experiments. Paired  $t$ -test. (f-j) Scratch wound migration assays were performed in  
 55 SK-BR-3 (g, h) and BT-474 (i, j) cells using conditioned media from control or MLCK siRNA-  
 56 treated MCF10A cells. Scale bars, 200  $\mu$ m.  $n=3-4$  independent experiments. Paired  $t$ -test.  
 57 mean $\pm$ s.e.m. \* $P<0.05$ , \*\* $P<0.01$

58 **Supplementary Figure 3**

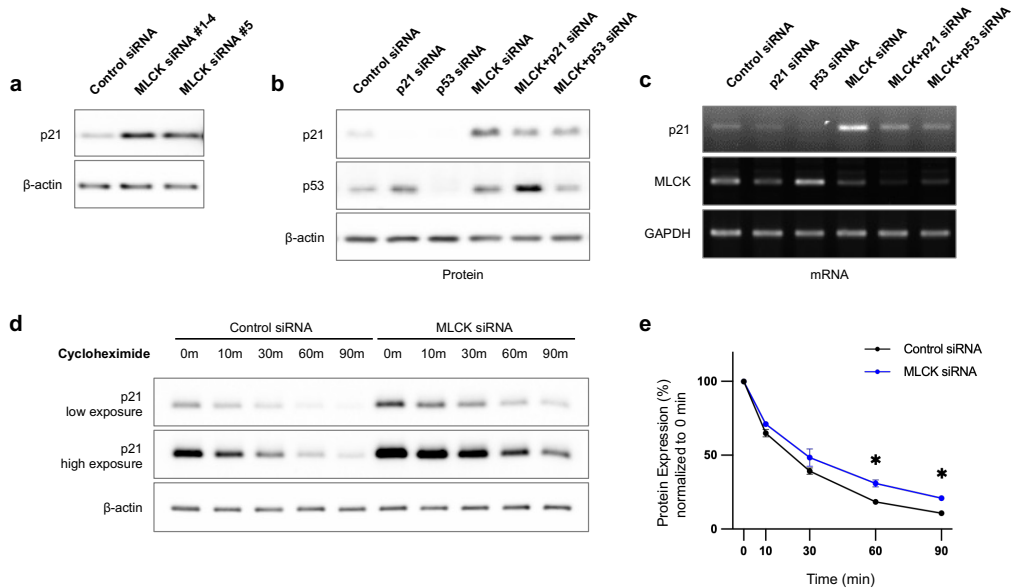

59

60 **Supplementary Figure 3. Downregulation of MLCK increases p53-dependent p21**

61 **expression.** (a) Western blot analysis of control and MLCK siRNA-treated cells.  $\beta$ -actin is shown

62 as a loading control. (b-c) The level of p21 protein and mRNA transcripts are downregulated after

63 silencing of p53 in MLCK-depleted cells.  $\beta$ -actin or GAPDH is shown as a loading control. (d-e)

64 The 20  $\mu$ g/ml cycloheximide was used to analyze p21 protein degradation in both control and

65 MLCK-depleted cells, with subsequent quantification of p21 protein expression levels following

66 cycloheximide treatment.  $\beta$ -actin is shown as a loading control. Original gels/blots are presented

67 in Supplementary Figure 6. n=2 independent experiments. Two-way ANOVA with Sidak's multiple

68 comparisons test. mean $\pm$ s.e.m. \* $P < 0.05$

69

70 **Supplementary Figure 4**

Figure 2e

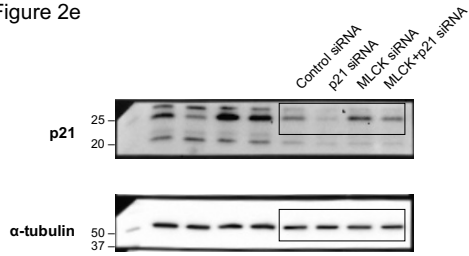

Figure 4c

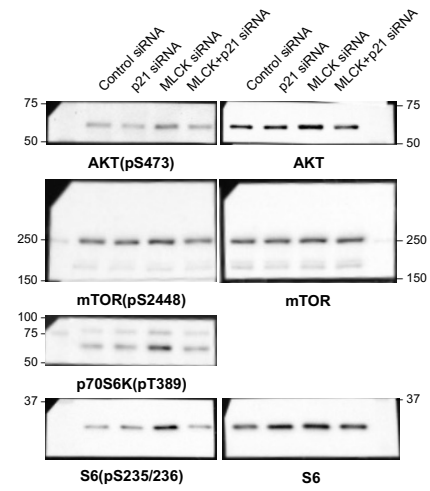

Figure 4d

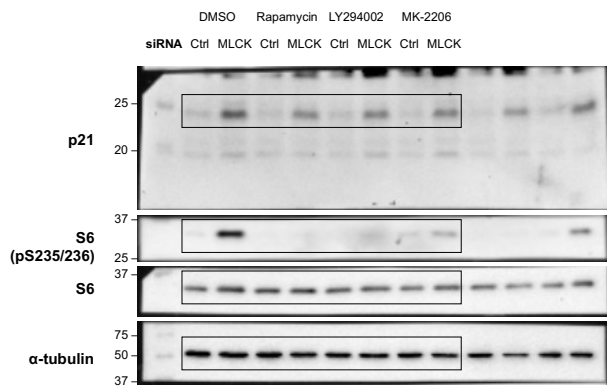

Figure 4e

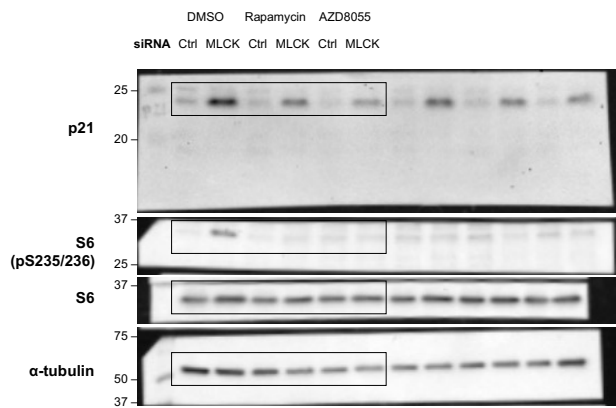

71

72 **Supplementary Figure 4. Source data for Figure 2a and Figure 4c-e**

73 **Supplementary Figure 5**

Supplementary Figure 1a

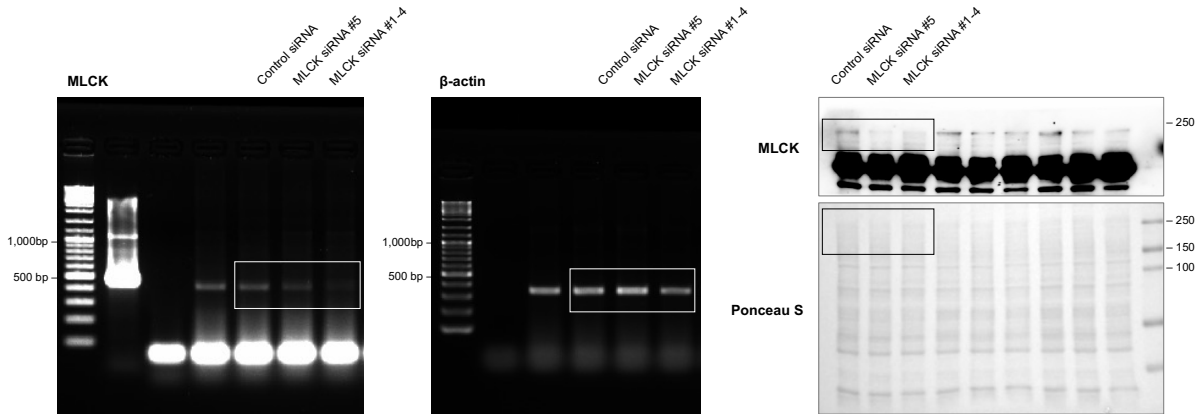

Supplementary Figure 2a

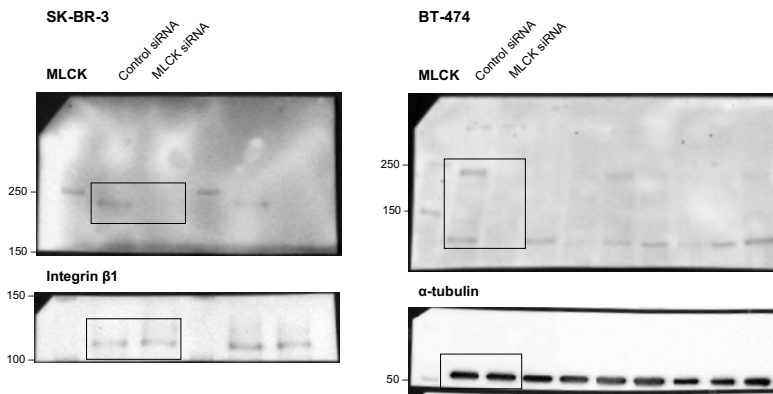

74

75 **Supplementary Figure 5. Source data for Supplementary Figure 1a and 2a**

76 **Supplementary Figure 6**

Supplementary Figure 3a

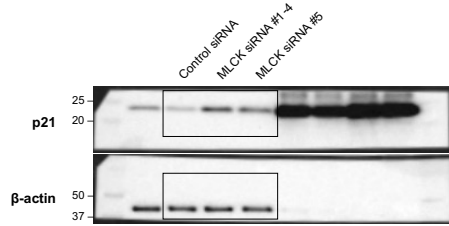

Supplementary Figure 3b

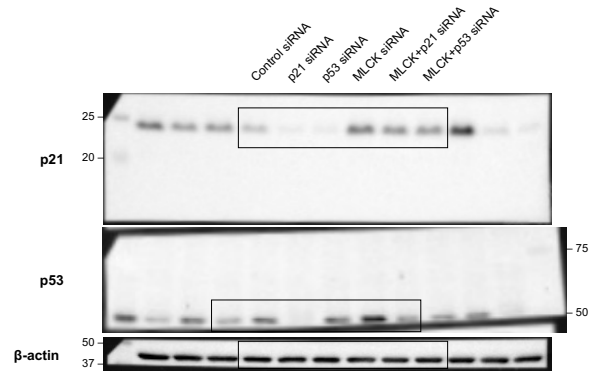

Supplementary Figure 3c

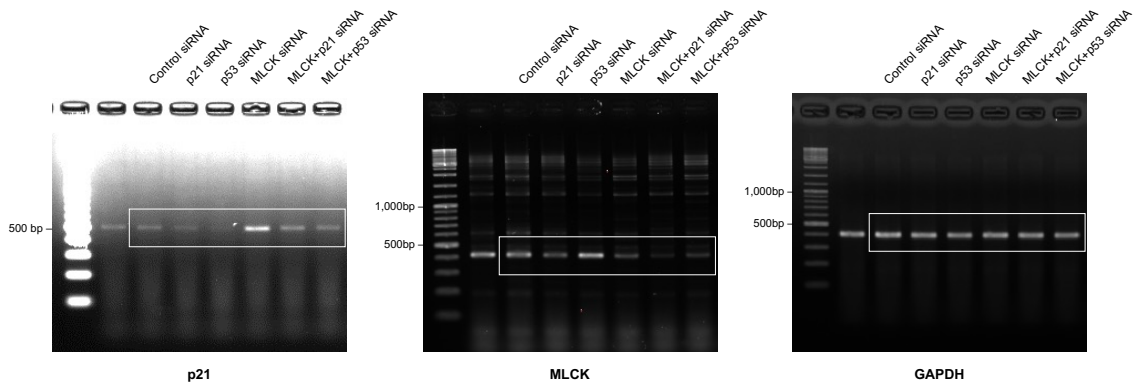

Supplementary Figure 3d

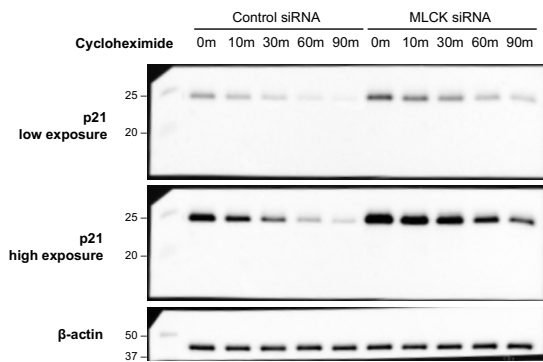

77

78 **Supplementary Figure 6. Source data for Supplementary Figure 3**

79 **Supplementary Video 1. Scratch wound migration with control siRNA-treated conditioned**  
80 **media.** MCF10A cells were incubated with CM from control siRNA-treated cells. Cells were  
81 imaged every 10 minutes for 16 hours. Scale bars, 100  $\mu\text{m}$ .

82

83 **Supplementary Video 2. Scratch wound migration with MLCK siRNA-treated conditioned**  
84 **media.** MCF10A cells were incubated with CM from MLCK siRNA-treated cells. Cells were  
85 imaged every 10 minutes for 16 hours. Scale bars, 100  $\mu\text{m}$ .

86

87 **Supplementary Table 1. Reverse-phase protein array results comparing control and**  
88 **MLCK-depleted MCF10A cells.**
